# Supplementary material
Source: PubMed Central journal article supplement (PMC8691695)

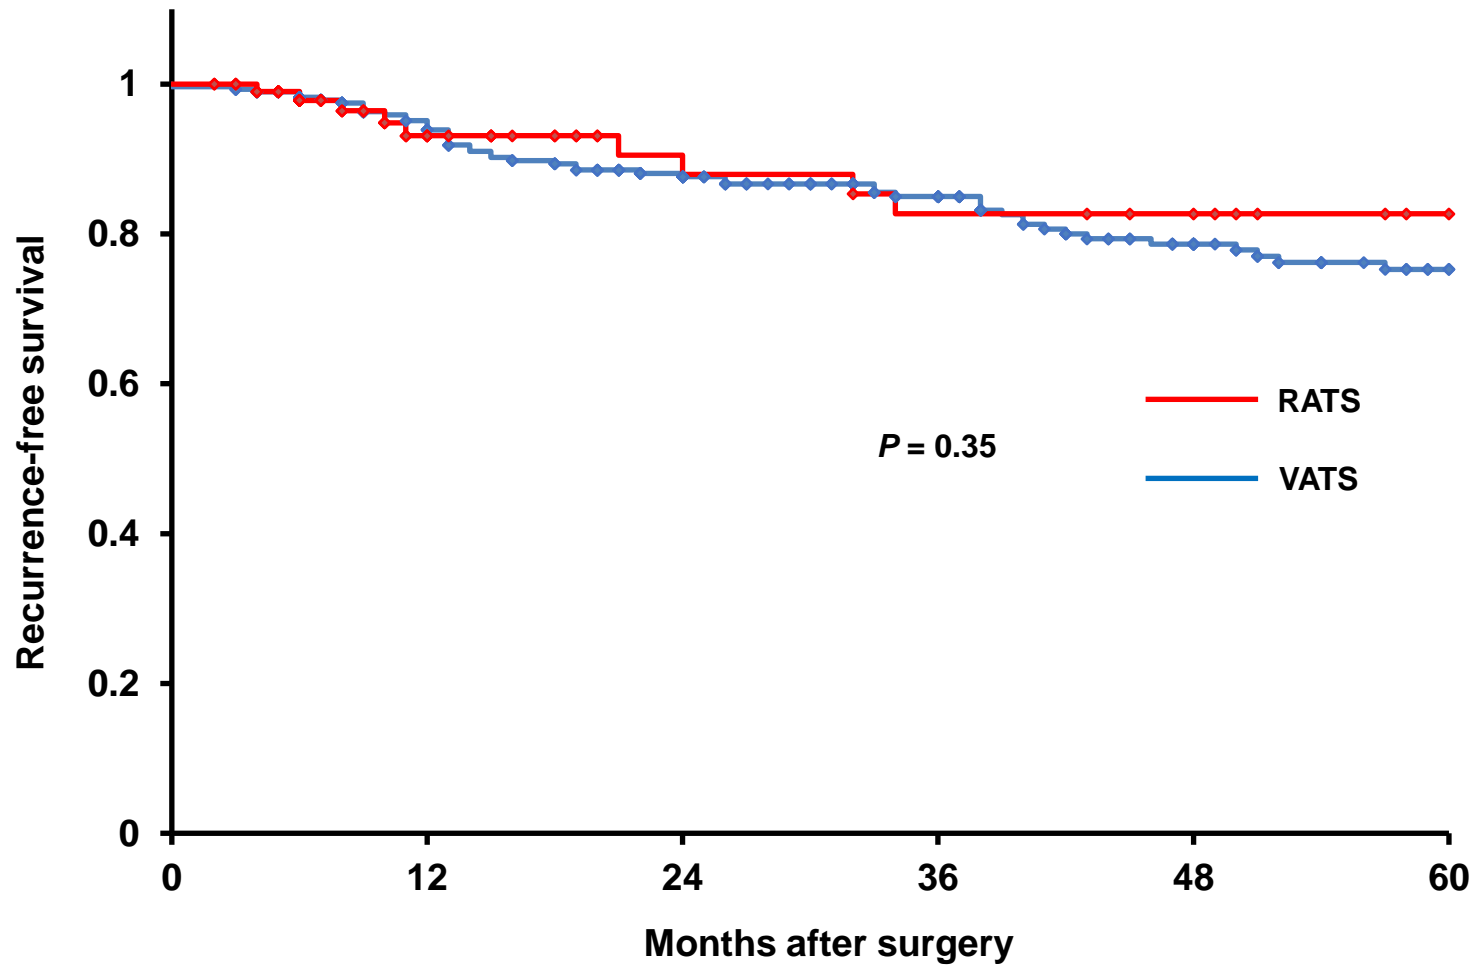

Patients at risk

|      |     |     |     |     |     |    |
|------|-----|-----|-----|-----|-----|----|
| RATS | 104 | 52  | 35  | 32  | 29  | 23 |
| VATS | 286 | 237 | 195 | 149 | 109 | 77 |

Supplemental figure 1

Supplement: ivab112_supplementary_data.pdf [file ivab112_supplementary_data.pdf]
